# Supplementary material for: Effects of a Rice Bran Dietary Intervention on the Composition of the Intestinal Microbiota of Adults with a High Risk of Colorectal Cancer: A Pilot Randomised-Controlled Trial
Source: PubMed Central journal article supplement (PMC7915415; doi:10.3390/nu13020526), 2021-02-06

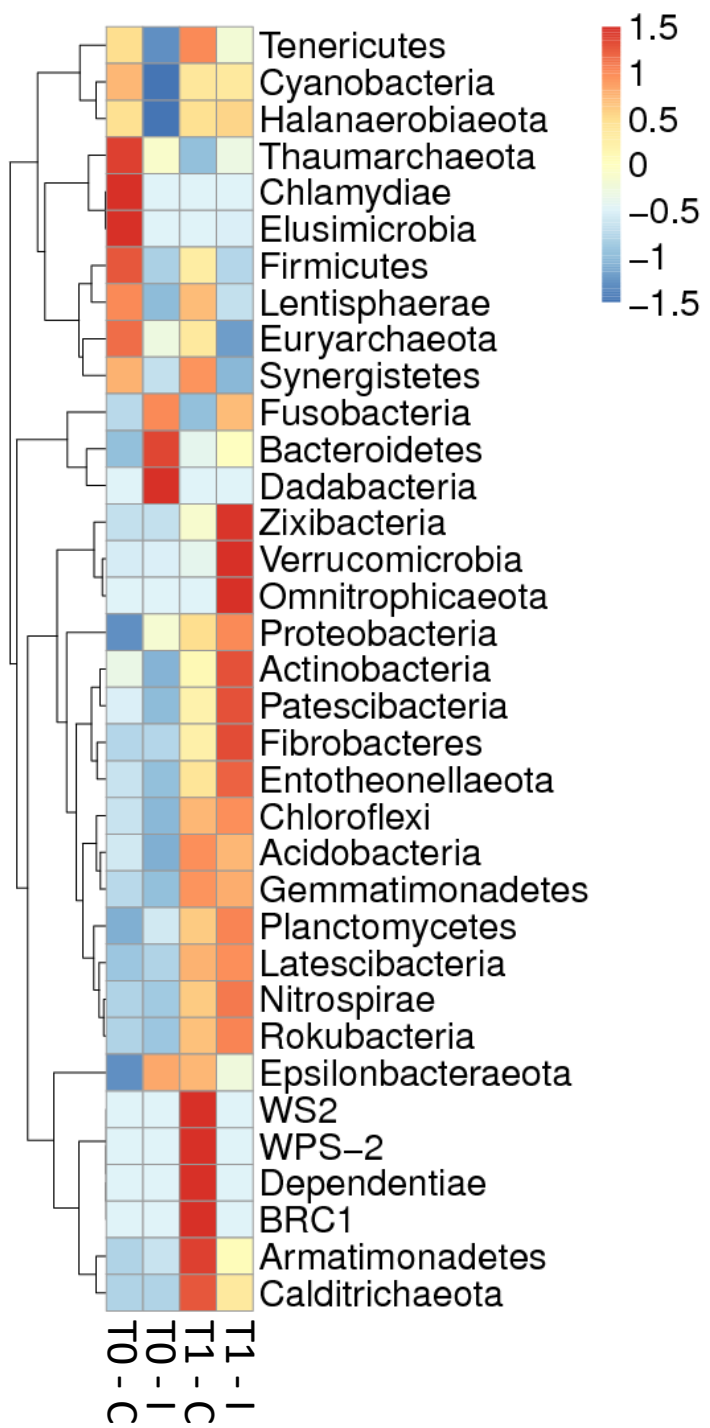

Supplement: nutrients-13-00526-s001.pdf [file nutrients-13-00526-s001.pdf]
